# Supplementary material for: Genome Consortium for Active Teaching: Meeting the Goals of BIO2010
Source: Atypon-hosted journal article supplement (doi:10.1187/cbe.06-10-0196), 2007-06-01
Supplement: appendixb.pdf [file appendixb.pdf]

## Appendix B: Student Pre-GCAT Survey

What year in school are you?

- Freshman
- Sophomore
- Junior
- Senior

What is your gender

- Male
- Female

What is your ethnicity

- Caucasian/white
- African American/black
- Hispanic/Latino
- Asian American
- Multi Racial
- Other

Which of the following fits the description of your Major best?

- biology
- pre-medicine
- education
- chemistry
- mathematics/computer science
- physics
- non-science

What is your approximate overall G.P.A.?

- 3.50-4.00
- 3.00-3.49
- 2.50-2.99
- 2.00-2.49
- 1.50-1.99
- 1.00-1.49

Is this course a requirement of your major?

- Yes
- No

Based on the title/content, which of the following courses have you completed?  
(choose all that apply)

Introductory biology  
Genetics  
Microbiology  
Immunology  
Inorganic chemistry  
Organic chemistry  
Developmental biology  
Neuroscience  
Calculus  
Statistics  
Physics  
Molecular biology/genetics  
Cell biology  
Biochemistry  
Genomics  
Bioinformatics  
Probability  
None of the above

If you intend to continue your education beyond undergraduate school, then in which field?

None  
Biology: behavior, ecology of field biology  
Biology: cell, molecular, genetics, biochemistry  
Medicine  
Mathematics/computer science  
Law  
Chemistry  
Physics  
Education  
Non-science  
Don't know

Which types of lab research experience have you had in college?

Introductory labs  
Upper level labs  
Independent study  
Thesis research  
Laboratory technician  
Summer research  
No previous experience

For the following areas, please rate your change in interest and understanding  
1 = decreased a lot, 7= increased a lot

Genomics

Biology

Research

End of survey

Move to Knowledge Questions (Appendix D)
