# Supplementary material for: Genome Consortium for Active Teaching: Meeting the Goals of BIO2010
Source: Atypon-hosted journal article supplement (doi:10.1187/cbe.06-10-0196), 2007-06-01
Supplement: appendixc.pdf [file appendixc.pdf]

## Appendix C: Student Post-GCAT Survey

### Knowledge Questions (Appendix D)

What grade do you expect to achieve in this course?

A

B

C

D

F

Other (please specify)

Using the GCAT materials, were you able to...

Make your own probe

Get the chips scanned

Get useable data from the chips

Analyze your own data

What software did you use for analysis?

MAGIC Tool

GenePix

ScanAlyze

JTreeView

GeneSpring

Other (please specify)

For the following activities, please rate the effectiveness of each activity at improving your understanding and interest in the material. If you didn't engage in an activity, please select "Not Applicable".

1 = Not effective at all, 7 = highly effective

Practicing data analysis before I began analyzing my own data

Isolating RNA or genomic DNA to produce probe

Producing the fluorescently-labeled probe

Hybridizing the probe with the spotted DNA

Designing my own experiment

Analyzing data from public domain source

Reading papers that used DNA microarrays

In regards to the genomics part of the course or lab experience, list the top three aspects that hindered your learning the material well.

In regards to the genomics part of the course or lab experience, list the top three aspects that helped you learn the material best.

What part of the process was the hardest for you to understand?
